# Supplementary material for: Epithelial–Mesenchymal Transition Participates in the Formation of Vestibular Flat Epithelium
Source: Front Mol Neurosci. 2021 Dec 17;14:809878. doi: 10.3389/fnmol.2021.809878 (PMC8719593; doi:10.3389/fnmol.2021.809878)
Supplement: Supplementary file 3 [file Table_3.XLSX]

## Sheet: Sheet1
Supplementary Table 3. KEGG pathway enrichment analysis of upregulated differnetial expressed genes
pathway_id	pathway_name	population_mapped_id	study_mapped_id	enrichment	p_value	FDR
mmu04512	ECM-receptor interaction	83	37	6.26045	2.69912e-21	7.07168e-19
mmu04510	Focal adhesion	201	49	3.42359	6.38281e-15	8.36148e-13
mmu04380	Osteoclast differentiation	132	37	3.93649	1.47795e-13	1.29074e-11
mmu05200	Pathways in cancer	395	69	2.4532	1.03879e-12	6.80405e-11
mmu04151	PI3K-Akt signaling pathway	345	63	2.5645	1.46289e-12	7.66556e-11
mmu04210	Apoptosis	138	34	3.46004	7.54471e-11	3.29452e-09
mmu05150	Staphylococcus aureus infection	52	20	5.40143	1.18246e-10	4.42579e-09
mmu05152	Tuberculosis	178	37	2.9192	1.97717e-09	6.47523e-08
mmu05140	Leishmaniasis	66	21	4.46845	2.38132e-09	6.93229e-08
mmu05133	Pertussis	75	22	4.11949	5.50678e-09	1.44278e-07
mmu04933	AGE-RAGE signaling pathway in diabetic complications	102	26	3.57977	6.19159e-09	1.47472e-07
mmu05222	Small cell lung cancer	85	23	3.80006	1.3742e-08	3.00033e-07
mmu05205	Proteoglycans in cancer	207	38	2.57807	4.3301e-08	8.72682e-07
mmu05161	Hepatitis B	145	30	2.90559	7.70581e-08	1.44209e-06
mmu04611	Platelet activation	123	27	3.08276	9.65276e-08	1.58102e-06
mmu05146	Amoebiasis	108	25	3.25086	9.6551e-08	1.58102e-06
mmu04110	Cell cycle	124	27	3.0579	1.15293e-07	1.67815e-06
mmu04142	Lysosome	124	27	3.0579	1.15293e-07	1.67815e-06
mmu04115	p53 signaling pathway	68	19	3.92398	1.44888e-07	1.99793e-06
mmu04145	Phagosome	184	34	2.59503	1.92179e-07	2.51755e-06
mmu04620	Toll-like receptor signaling pathway	101	23	3.19807	4.31945e-07	5.38903e-06
mmu04662	B cell receptor signaling pathway	74	19	3.60582	6.1764e-07	7.14303e-06
mmu05142	Chagas disease (American trypanosomiasis)	103	23	3.13597	6.2706e-07	7.14303e-06
mmu05202	Transcriptional misregulation in cancers	177	32	2.53898	7.36432e-07	8.03938e-06
mmu04062	Chemokine signaling pathway	195	34	2.44865	7.96342e-07	8.34566e-06
mmu04668	TNF signaling pathway	109	23	2.96335	1.79902e-06	1.81286e-05
mmu05414	Dilated cardiomyopathy (DCM)	89	20	3.15589	3.04992e-06	2.95955e-05
mmu04974	Protein digestion and absorption	90	20	3.12082	3.66553e-06	3.42989e-05
mmu05144	Malaria	55	15	3.8301	4.19836e-06	3.793e-05
mmu05132	Salmonella infection	78	18	3.24086	6.37804e-06	5.57016e-05
mmu05410	Hypertrophic cardiomyopathy (HCM)	86	19	3.10268	7.01539e-06	5.92913e-05
mmu04610	Complement and coagulation cascades	87	19	3.06702	8.39128e-06	6.87036e-05
mmu05162	Measles	138	25	2.54415	1.16615e-05	9.25849e-05
mmu05323	Rheumatoid arthritis	83	18	3.04562	1.60232e-05	0.000123473
mmu04060	Cytokine-cytokine receptor interaction	274	39	1.99892	2.13861e-05	0.000158021
mmu04810	Regulation of actin cytoskeleton	216	33	2.14557	2.17127e-05	0.000158021
mmu04670	Leukocyte transendothelial migration	119	22	2.59632	2.80123e-05	0.000198358
mmu04640	Hematopoietic cell lineage	95	19	2.80874	3.15831e-05	0.000217757
mmu05145	Toxoplasmosis	113	21	2.60989	3.91613e-05	0.000263084
mmu05220	Chronic myeloid leukemia	73	16	3.07807	4.10881e-05	0.000269127
mmu04666	Fc gamma R-mediated phagocytosis	89	18	2.8403	4.34656e-05	0.000277756
mmu04015	Rap1 signaling pathway	215	32	2.09023	4.89852e-05	0.000305574
mmu04621	NOD-like receptor signaling pathway	169	27	2.24367	5.50527e-05	0.000335438
mmu05164	Influenza A	170	27	2.23047	6.11601e-05	0.000364181
mmu04064	NF-kappa B signaling pathway	102	19	2.61598	8.77839e-05	0.000511097
mmu05210	Colorectal cancer	64	14	3.07206	0.000126229	0.000718955
mmu05212	Pancreatic cancer	66	14	2.97897	0.000178868	0.000997092
mmu04650	Natural killer cell mediated cytotoxicity	157	24	2.14681	0.000281959	0.00153903
mmu04664	Fc epsilon RI signaling pathway	70	14	2.80874	0.000342732	0.00183256
mmu05219	Bladder cancer	41	10	3.42529	0.000461408	0.00241778
mmu04350	TGF-beta signaling pathway	85	15	2.4783	0.00086347	0.00443587
mmu01522	Endocrine resistance	95	16	2.36526	0.00099477	0.00501211
mmu04068	FoxO signaling pathway	134	20	2.09608	0.00120386	0.00595117
mmu05215	Prostate cancer	89	15	2.36692	0.00140664	0.00682481
mmu05412	Arrhythmogenic right ventricular cardiomyopathy (ARVC)	72	13	2.53567	0.0015109	0.00719738
mmu05221	Acute myeloid leukemia	57	11	2.71019	0.00197088	0.00922089
mmu05214	Glioma	66	12	2.5534	0.00213327	0.00980554
mmu05134	Legionellosis	58	11	2.66346	0.00227971	0.010298
mmu00531	Glycosaminoglycan degradation	21	6	4.01249	0.00273346	0.0121384
mmu05216	Thyroid cancer	29	7	3.38986	0.00351052	0.0153293
mmu05166	HTLV-I infection	285	33	1.62611	0.0036202	0.0155491
mmu04914	Progesterone-mediated oocyte maturation	89	14	2.20912	0.00387642	0.016381
mmu05218	Melanoma	71	12	2.37358	0.0040085	0.0166703
mmu04514	Cell adhesion molecules (CAMs)	169	22	1.82817	0.00414599	0.0169726
mmu05168	Herpes simplex infection	215	26	1.69831	0.00528462	0.0213011
mmu04010	MAPK signaling pathway	252	29	1.61614	0.00672668	0.0267029
mmu00511	Other glycan degradation	18	5	3.90103	0.00707405	0.0276627
mmu05203	Viral carcinogenesis	233	27	1.62738	0.00799515	0.0308049
mmu05020	Prion diseases	34	7	2.89135	0.00888057	0.0337204
mmu05322	Systemic lupus erythematosus	142	18	1.78019	0.0117556	0.0439994
mmu04924	Renin secretion	72	11	2.14557	0.0122863	0.0453381
mmu01521	EGFR tyrosine kinase inhibitor resistance	82	12	2.05518	0.0127359	0.0463444
mmu04024	cAMP signaling pathway	199	23	1.62314	0.0141233	0.050689
mmu05224	Breast cancer	146	18	1.73142	0.0153747	0.0544348
mmu05223	Non-small cell lung cancer	56	9	2.25702	0.0164802	0.0573629
mmu04211	Longevity regulating pathway - mammal	95	13	1.92177	0.0166396	0.0573629
mmu00514	Other types of O-glycan biosynthesis	22	5	3.19175	0.0171724	0.0579241
mmu04114	Oocyte meiosis	116	15	1.816	0.0172446	0.0579241
mmu05211	Renal cell carcinoma	67	10	2.09608	0.0193173	0.064065
mmu01524	Platinum drug resistance	78	11	1.98052	0.0215536	0.070588
mmu04014	Ras signaling pathway	230	25	1.52649	0.0219467	0.0709881
mmu04215	Apoptosis - multiple species	32	6	2.63319	0.0234545	0.0749398
mmu04390	Hippo signaling pathway	154	18	1.64147	0.0251741	0.0794653
mmu05206	MicroRNAs in cancer	280	29	1.45453	0.0258977	0.0807761
mmu04360	Axon guidance	177	20	1.58686	0.0263215	0.081132
mmu04657	IL-17 signaling pathway	91	12	1.85192	0.0272123	0.0829027
mmu04722	Neurotrophin signaling pathway	123	15	1.71265	0.0278561	0.0838886
mmu05213	Endometrial cancer	52	8	2.16057	0.0293697	0.0874416
mmu04623	Cytosolic DNA-sensing pathway	63	9	2.00624	0.0332177	0.097787
mmu04392	Hippo signaling pathway - multiple species	26	5	2.70071	0.0339496	0.098831
mmu00770	Pantothenate and CoA biosynthesis	18	4	3.12082	0.0349402	0.0999937
mmu00760	Nicotinate and nicotinamide metabolism	35	6	2.40749	0.0351123	0.0999937
mmu05340	Primary immunodeficiency	36	6	2.34062	0.039698	0.111838
mmu04540	Gap junction	86	11	1.79629	0.0407872	0.113684
mmu04915	Estrogen signaling pathway	98	12	1.71964	0.0448245	0.123621
mmu04066	HIF-1 signaling pathway	109	13	1.67494	0.0453057	0.123647
mmu04923	Regulation of lipolysis in adipocyte	57	8	1.97105	0.0474086	0.128052
mmu00532	Glycosaminoglycan biosynthesis - chondroitin sulfate / dermatan sulfate	20	4	2.80874	0.0494624	0.132236
